# Supplementary material
Source: Research Square preprint supplement (doi:10.21203/rs.3.rs-9177990/v1)
Supplement: Supplementary file 1 [file 05d5c30184a2a9855f51a218.doc]

**Supporting Information**

**Fingerprint-Inspired Flexible Capacitive Sensor for Multi-Directional Tangential Force Sensing via Laser-Etched Geometry**


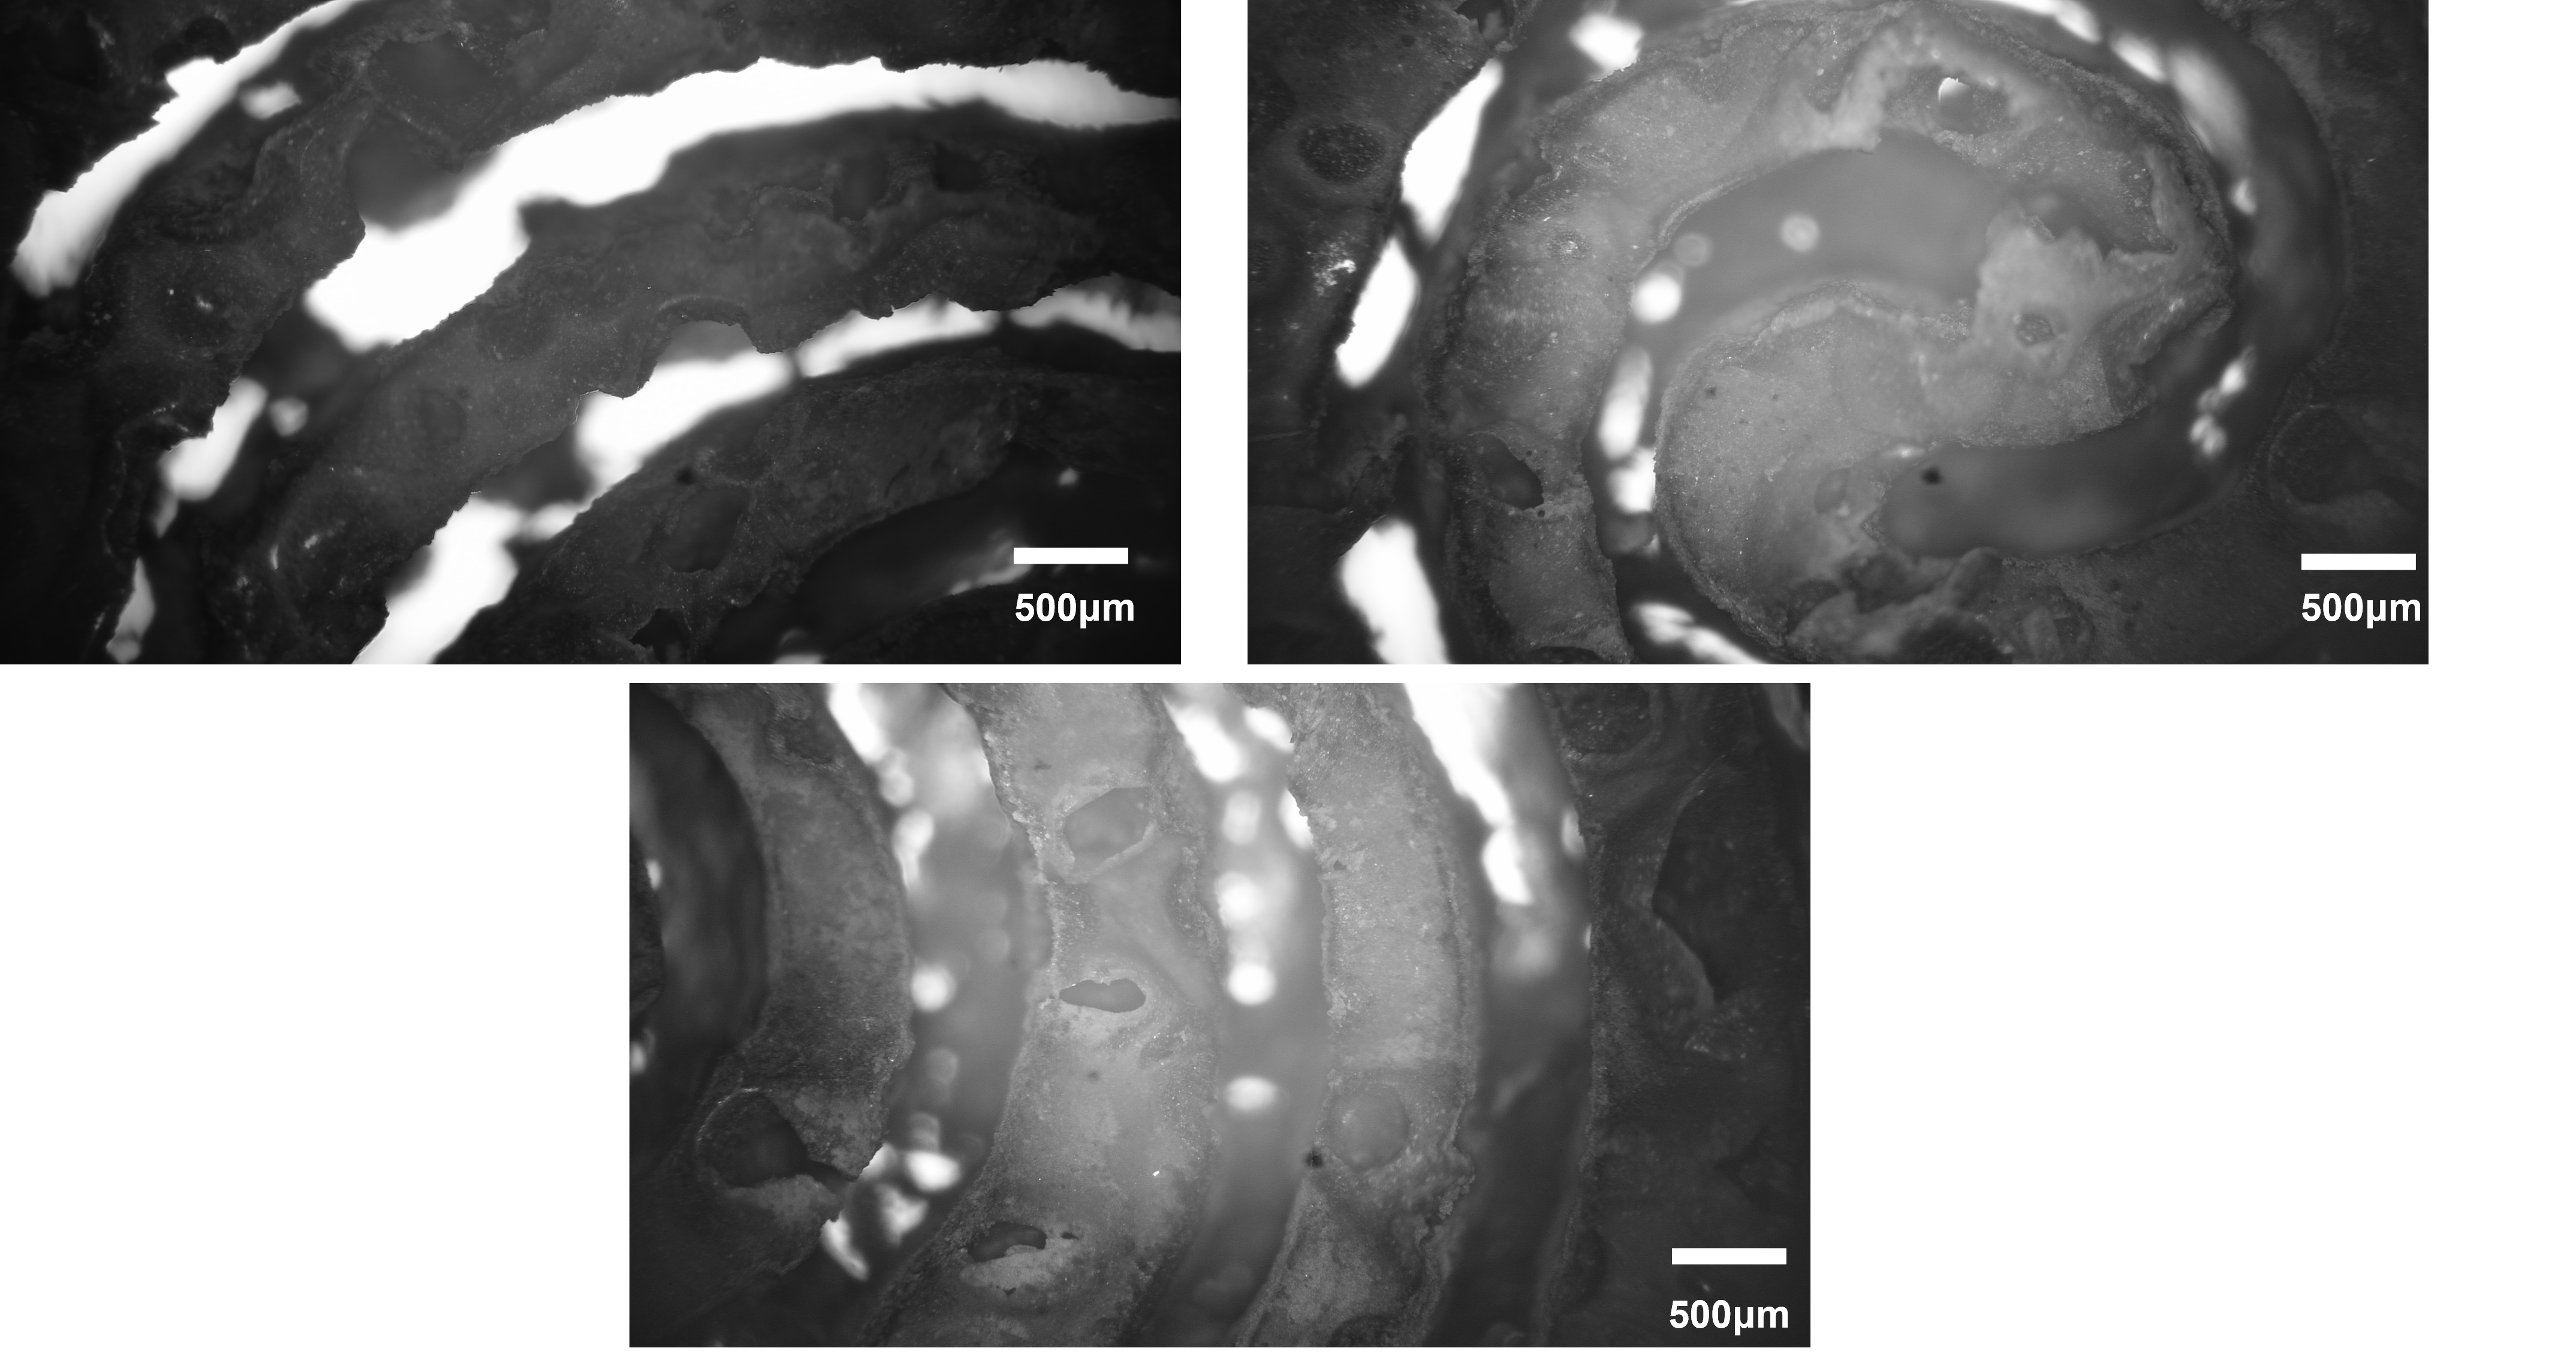


Figure S1. The optical microscope image of a sample without conductive silicone filling

Figure S2. Different pressures were applied to a sensor with an electrode spacing of 400 μm
